# Supplementary material
Source: PubMed Central journal article supplement (PMC3425201)
Supplement: supp_pp.112.199778_199778Supplemental_Figures.pdf [file supp_pp.112.199778_199778Supplemental_Figures.pdf]

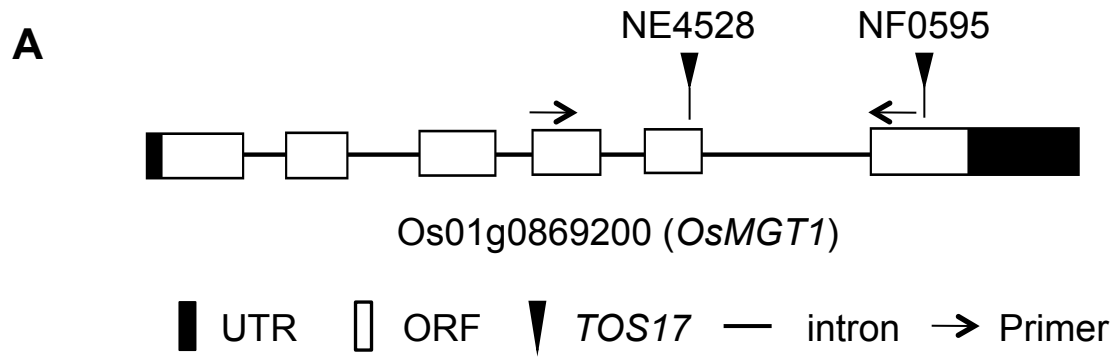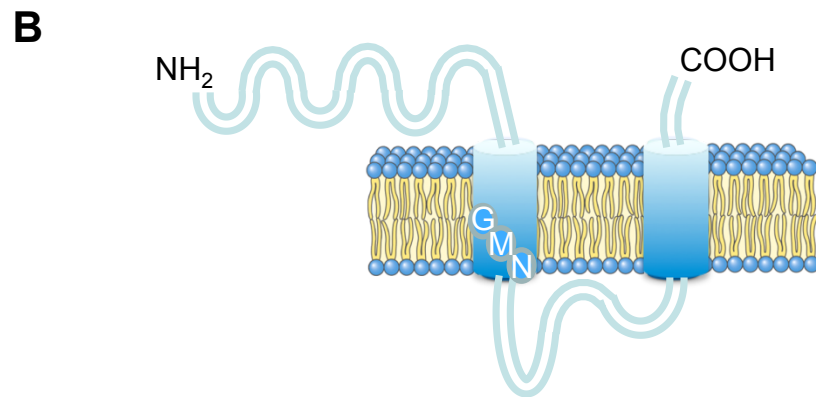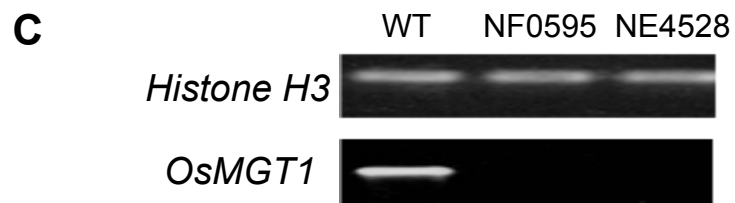

**Supplemental Figure S1.** Gene structure (A), predicated membrane domains (B) and mRNA expression of Tos-17 lines of *OsMGT1* examined by RT-PCR. Insertion position of two Tos-17 insertion lines (NF0595 and NE4528) indicated by triangles.



## Down-regulated

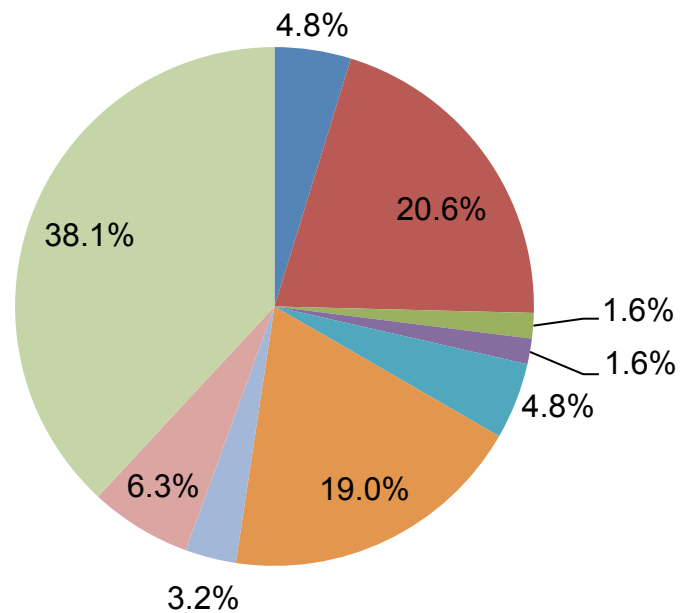

## Up-regulated

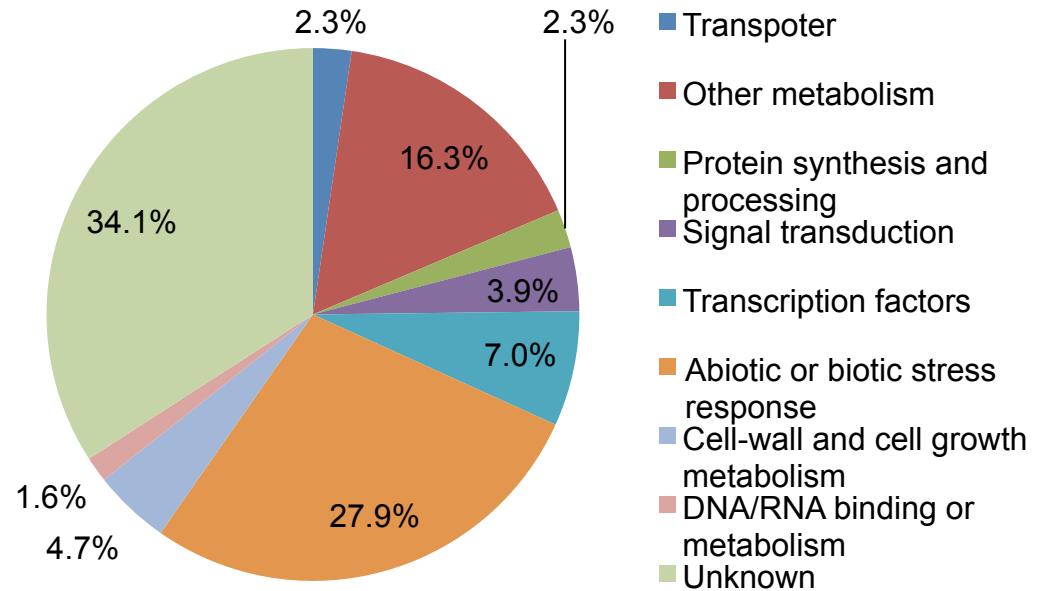

**Supplemental Figure S3.** Functional classification of down- or up-regulated genes in *OsMGT1* knockout line. Microarray analysis was conducted with roots of wild-type (WT) rice and a knockout line (NE4528) exposed to 50  $\mu$ M (pH 4.5) AI for six hours. Genes significantly down-regulated or up-regulated more than 2 folds in the knockout line compared with WT were selected. Genes were categorized into 9 classes according to the OryzaExpress database (<http://bioinf.mind.meiji.ac.jp/OryzaExpress/>).
